# Supplementary material for: Synthesis of a poly(amidoxime-hydroxamic acid) cellulose derivative and its application in heavy metal ion removal
Source: Royal Society of Chemistry journal article supplement (doi:10.1039/c7ra03365f), 2017-01-01
Supplement: c7ra03365f1.pdf [file c7ra03365f1.pdf]

## Supplementary information

| Table S1<br>ions<br>various                                    | Adsorbent | Adsorption capacity (mg/g)                 |                  |                  |                  | Reference | Metal<br>uptake by |
|----------------------------------------------------------------|-----------|--------------------------------------------|------------------|------------------|------------------|-----------|--------------------|
|                                                                |           | Cu <sup>2+</sup>                           | Pb <sup>2+</sup> | Cr <sup>3+</sup> | Zn <sup>2+</sup> |           |                    |
|                                                                |           | Polyamidoxime chelating corn-cob cellulose | 216.1            |                  | 215.3            |           |                    |
| Poly(amidoxime) chelating khaya cellulose                      | 282       |                                            | 229              | 211              | 32               |           |                    |
| Amidoxime-modified polyacrylonitrile nanofibers                | 52.70     | 263.5                                      |                  |                  | 35               |           |                    |
| Poly(hydroxamic acid)-poly(amidoxime) acacia cellulose         | 163.2     |                                            | 145.6            | 245.7            | 36               |           |                    |
| Poly(amidoxime) chelating sago starch                          | 192       |                                            |                  | 60.8             | 43               |           |                    |
| Poly(hydroxamic acid) chelating sago starch                    | 221.4     |                                            | 126.4            |                  | 44               |           |                    |
| Amidoximed cotton cellulose ligand                             | 102.4     |                                            |                  |                  | 45               |           |                    |
| Fibrous amidoxime-functionalized SiO <sub>2</sub> microspheres |           | 284                                        |                  |                  | 46               |           |                    |
| Poly(amidoxime-hydroxamic acid) cotton cellulose               | 395.3     | 333.3                                      | 268.8            | 216.9            | This work        |           |                    |

adsorbents containing amidoxime and/or hydroxamic acid functional groups
